# Supplementary material
Source: PubMed Central journal article supplement (PMC9937426)

## Appendix

### Was Kaposi's Sarcoma-Associated Herpesvirus Introduced into China via Ancient Silk Road: An Evolutionary Perspective?

Zhenqiu Liu<sup>1</sup>, Qiwen Fang<sup>1</sup>, Jialu Zuo<sup>1</sup>, Veenu Minhas<sup>2</sup>, Charles Wood<sup>2</sup>, Na He<sup>1</sup>,  
Tiejun Zhang<sup>1 3‡</sup>

1. Department of Epidemiology, School of Public Health, Fudan University, Shnanghai, China and Key Laboratory of Public Health Safety (Fudan University), Ministry of Education, China.
2. Nebraska Center of Virology and the School of Biological Sciences, University of Nebraska-Lincoln, USA.
- 3 Collaborative Innovation Center of Social Risks Governance in Health, Fudan University, Shanghai, China.

‡: Correspondence: Tiejun Zhang or Na He MD., PhD., Professor of Epidemiology, School of Public Health, Fudan University, and Key Laboratory of Public Health Safety (Fudan University), Ministry of Education, Shanghai, 200032, China. Email: [tjzhang@shmu.edu.cn](mailto:tjzhang@shmu.edu.cn); TEL/FAX: +86-21- 54237410.

**Running title:** Introduction of KSHV into China

## Contents

**Appendix Table1:** Viral strains used in this analysis.

**Appendix Table2:** Genetic distance between groups and within groups.

**Appendix Table3:** Sites found to be under positive selection pressure via three approaches within Chinese sequences.

**Appendix Table4:** Sites found to be under positive selection pressure via three approaches within all sequences.

**Appendix Figure1:** The Maximum Likelihood tree of KSHV sequences with following parameters: 1,000 bootstrap replicates, randomly broken site, and general time-reversible distance measure with a gamma distribution shape parameter of 0.5.

**Appendix Figure2:** The Maximum Parsimony tree of KSHV sequences with following parameters: 1,000 bootstrap replicates, randomly broken site, and general time-reversible distance measure with a gamma distribution shape parameter of 0.5.

**Appendix Figure3:** The MCC tree of KSHV sequences from Xinjiang, China.

**Appendix Figure4:** The MCC tree of KSHV sequences from Iran.

**Appendix Figure5:** The MCC tree of KSHV sequences from Italy & Greece.

**Appendix Figure6:** The MCC tree of KSHV sequences from Southern Siberia.

**Appendix Figure7:** The Bayesian skyline plot of KSHV sequences from China.

**Appendix Figure8:** The Bayesian skyline plot of KSHV sequences from Iran, Italy & Greece.

**Appendix Figure9:** The Bayesian skyline plot of KSHV sequences from Southern Siberia

**Appendix Figure10:** The substitution rate of KSHV ORFK1 obtained from Bayesian evolutionary analysis.

**Appendix Figure11:** The tree height of KSHV ORFK1 obtained from Bayesian evolutionary analysis.

**Appendix Table1. Viral strains used in this analysis**

| Name             | Continent | Country/area | Subtype    | Sample year | Access Number |
|------------------|-----------|--------------|------------|-------------|---------------|
| EU-ITA17-C0-1995 | Europe    | Italy        | C0 $\zeta$ | 1995        | AF130286.1    |
| EU-ITA18-A0-1995 | Europe    | Italy        | A0 $\zeta$ | 1995        | AF130285.1    |
| EU-ITA19-A0-1995 | Europe    | Italy        | A5         | 1995        | AF130284.1    |
| EU-ITA20-A0-1995 | Europe    | Italy        | A5         | 1995        | AF130283.1    |
| EU-ITA21-A0-1995 | Europe    | Italy        | A5         | 1995        | AF130282.1    |
| EU-ITA22-C0-1993 | Europe    | Italy        | C0         | 1993        | AF130281.1    |
| EU-ITA23-A3-1998 | Europe    | Italy        | A3         | 1998        | AF130280.1    |
| EU-ITA24-A3-1998 | Europe    | Italy        | A3         | 1998        | AF130279.1    |
| EU-ITA25-C0-1997 | Europe    | Italy        | C0         | 1997        | AF130278.1    |
| EU-ITA26-C0-1993 | Europe    | Italy        | C0         | 1993        | AF130277.1    |
| EU-ITA27-C0-1995 | Europe    | Italy        | C0         | 1995        | AF130276.1    |
| EU-ITA28-A2-1994 | Europe    | Italy        | A2         | 1994        | AF130275.1    |
| EU-ITA29-C0-1997 | Europe    | Italy        | C3         | 1997        | AF130274.1    |
| EU-ITA30-C0-1996 | Europe    | Italy        | C1         | 1996        | AF130271.1    |
| EU-ITA31-C0-1995 | Europe    | Italy        | C0         | 1995        | AF130270.1    |
| EU-ITA32-A0-1988 | Europe    | Italy        | A0         | 1988        | AF130269.1    |
| EU-ITA36-A4-2003 | Europe    | Italy        | A4         | 2003        | GU097430.1    |
| EU-ITA37-C0-1991 | Europe    | Italy        | C0         | 1991        | GU097425.1    |
| EU-ITA38-A3-2002 | Europe    | Italy        | A3         | 2002        | GU097421.1    |
| EU-ITA39-A4-1990 | Europe    | Italy        | A4         | 1990        | FJ884615.1    |
| EU-ITA40-C3-1991 | Europe    | Italy        | C3         | 1991        | FJ884614.1    |
| EU-ITA41-A0-1985 | Europe    | Italy        | A3         | 1985        | FJ884613.1    |
| EU-ITA42-A1-1984 | Europe    | Italy        | A1         | 1984        | FJ884612.1    |

---

|                  |        |        |    |      |            |
|------------------|--------|--------|----|------|------------|
| EU-ITA43-A3-1983 | Europe | Italy  | A3 | 1983 | FJ884611.1 |
| EU-GRE01-C0-1994 | Europe | Greece | C0 | 1994 | AF130268.1 |
| EU-GRE02-C0-1994 | Europe | Greece | C1 | 1994 | AF130267.1 |
| EU-GRE03-C1-1992 | Europe | Greece | C1 | 1992 | GU097423.1 |
| EU-GRE04-A3-1992 | Europe | Greece | A3 | 1992 | GU097420.1 |
| EU-GRE05-A3-1992 | Europe | Greece | A3 | 1992 | GU097419.1 |
| EU-GRE06-C0-1992 | Europe | Greece | C0 | 1992 | GU097417.1 |
| EU-GRE07-A3-1992 | Europe | Greece | A3 | 1992 | FJ884610.1 |
| EU-GRE08-A3-1992 | Europe | Greece | A3 | 1992 | FJ884608.1 |
| EU-GRE09-C0-1992 | Europe | Greece | C0 | 1992 | FJ884609.1 |
| AS-CHN01-C2-2006 | Asia   | China  | C2 | 2006 | FJ853388.1 |
| AS-CHN02-C2-2005 | Asia   | China  | C2 | 2005 | FJ853387.1 |
| AS-CHN03-A1-2004 | Asia   | China  | A1 | 2004 | FJ853386.1 |
| AS-CHN04-C2-2003 | Asia   | China  | C2 | 2003 | FJ853385.1 |
| AS-CHN05-A1-2002 | Asia   | China  | A1 | 2002 | FJ853384.1 |
| AS-CHN06-A1-2001 | Asia   | China  | A1 | 2001 | FJ853383.1 |
| AS-CHN07-C2-2000 | Asia   | China  | C2 | 2000 | FJ853382.1 |
| AS-CHN08-C2-1999 | Asia   | China  | C2 | 1999 | FJ853381.1 |
| AS-CHN09-C2-1998 | Asia   | China  | C2 | 1998 | FJ853380.1 |
| AS-CHN10-C3-1997 | Asia   | China  | C3 | 1997 | FJ853379.1 |
| AS-CHN11-C2-1998 | Asia   | China  | C2 | 1998 | FJ853378.1 |
| AS-CHN12-C2-1999 | Asia   | China  | C2 | 1999 | FJ853377.1 |
| AS-CHN13-C2-2000 | Asia   | China  | C2 | 2000 | FJ853376.1 |
| AS-CHN14-C-2001  | Asia   | China  | C2 | 2001 | FJ853375.1 |
| AS-CHN15-C3-2002 | Asia   | China  | C3 | 2002 | FJ853374.1 |
| AS-CHN16-C2-2003 | Asia   | China  | C2 | 2003 | FJ853373.1 |
| AS-CHN17-C2-2004 | Asia   | China  | C2 | 2004 | FJ853372.1 |
| AS-CHN18-A0-2005 | Asia   | China  | A3 | 2005 | FJ853371.1 |
| AS-CHN19-C2-2006 | Asia   | China  | C2 | 2006 | FJ853370.1 |
| AS-CHN20-C2-2005 | Asia   | China  | C2 | 2005 | FJ853369.1 |
| AS-CHN21-C2-2004 | Asia   | China  | C2 | 2004 | FJ853368.1 |
| AS-CHN22-C2-2003 | Asia   | China  | C2 | 2003 | FJ853367.1 |

---

---

|                  |      |       |    |      |            |
|------------------|------|-------|----|------|------------|
| AS-CHN22-C3-2009 | Asia | China | C3 | 2009 | KM582707.1 |
| AS-CHN23-A1-2009 | Asia | China | A1 | 2009 | KM582706.1 |
| AS-CHN24-A2-2009 | Asia | China | A2 | 2009 | KM582705.1 |
| AS-CHN25-A2-2009 | Asia | China | A2 | 2009 | KM582704.1 |
| AS-CHN26-C3-2009 | Asia | China | C3 | 2009 | KM582703.1 |
| AS-CHN27-A2-2008 | Asia | China | A2 | 2008 | KM582702.1 |
| AS-CHN28-A2-2008 | Asia | China | A2 | 2008 | KM582701.1 |
| AS-CHN29-A2-2008 | Asia | China | A2 | 2008 | KM582700.1 |
| AS-CHN30-A2-2008 | Asia | China | A2 | 2008 | KM582699.1 |
| AS-CHN31-A3-2008 | Asia | China | A3 | 2008 | KM582698.1 |
| AS-CHN32-A2-2008 | Asia | China | A2 | 2008 | KM582696.1 |
| AS-CHN33-A4-2008 | Asia | China | A4 | 2008 | KM582695.1 |
| AS-CHN34-A2-2008 | Asia | China | A2 | 2008 | KM582694.1 |
| AS-CHN35-A2-2008 | Asia | China | A2 | 2008 | KM582693.1 |
| AS-CHN36-A2-2008 | Asia | China | A2 | 2008 | KM582692.1 |
| AS-CHN37-A1-2008 | Asia | China | A1 | 2008 | KM582691.1 |
| AS-CHN38-C2-2008 | Asia | China | C2 | 2008 | KM582690.1 |
| AS-CHN39-C2-2008 | Asia | China | C2 | 2008 | KM582689.1 |
| AS-CHN40-C3-2008 | Asia | China | C3 | 2008 | KM582688.1 |
| AS-CHN41-A4-2007 | Asia | China | A4 | 2007 | KM582687.1 |
| AS-CHN42-C3-2007 | Asia | China | C3 | 2007 | KM582686.1 |
| AS-CHN43-A3-2007 | Asia | China | A3 | 2007 | KM582685.1 |
| AS-CHN44-A2-2007 | Asia | China | A2 | 2007 | KM582684.1 |
| AS-CHN45-A1-2007 | Asia | China | A1 | 2007 | KM582683.1 |
| AS-CHN46-A3-2007 | Asia | China | A3 | 2007 | KM582682.1 |
| AS-CHN47-A3-2007 | Asia | China | A3 | 2007 | KM582681.1 |
| AS-CHN48-A2-2007 | Asia | China | A2 | 2007 | KM582680.1 |
| AS-CHN49-A3-2008 | Asia | China | A3 | 2008 | KM582697.1 |
| AS-CHN50-A0-2007 | Asia | China | A3 | 2007 | FJ601805.1 |
| AS-CHN51-A0-2007 | Asia | China | A3 | 2007 | FJ601804.1 |
| AS-CHN52-A0-2007 | Asia | China | A1 | 2007 | FJ601803.1 |
| AS-IRA01-C0-2009 | Asia | Iran  | C0 | 2009 | HQ395619.1 |

---

---

|                  |      |      |    |      |            |
|------------------|------|------|----|------|------------|
| AS-IRA02-C0-2009 | Asia | Iran | C3 | 2009 | HQ395618.1 |
| AS-IRA03-A0-2009 | Asia | Iran | A0 | 2009 | HQ395617.1 |
| AS-IRA04-A0-2009 | Asia | Iran | A0 | 2009 | HQ395616.1 |
| AS-IRA05-A0-2009 | Asia | Iran | A0 | 2009 | HQ395615.1 |
| AS-IRA06-A0-2009 | Asia | Iran | A0 | 2009 | HQ395614.1 |
| AS-IRA07-A0-2009 | Asia | Iran | A0 | 2009 | HQ395613.1 |
| AS-IRA08-A0-2009 | Asia | Iran | A0 | 2009 | HQ395612.1 |
| AS-IRA09-A0-2009 | Asia | Iran | A0 | 2009 | HQ395611.1 |
| AS-IRA20-C0-2001 | Asia | Iran | C2 | 2001 | JN242284.1 |
| AS-IRA21-C0-2005 | Asia | Iran | C0 | 2005 | JN242283.1 |
| AS-IRA22-C0-2009 | Asia | Iran | C2 | 2009 | JN242282.1 |
| AS-IRA23-C0-2000 | Asia | Iran | C3 | 2000 | JN242281.1 |
| AS-IRA24-C0-2002 | Asia | Iran | C0 | 2002 | JN242280.1 |
| AS-IRA25-C0-2000 | Asia | Iran | C0 | 2000 | JN242279.1 |
| AS-IRA26-C0-2007 | Asia | Iran | C0 | 2007 | JN242278.1 |
| AS-IRA27-C0-2006 | Asia | Iran | C1 | 2006 | JN242277.1 |
| AS-IRA28-C0-2007 | Asia | Iran | C3 | 2007 | JN242276.1 |
| AS-IRA29-C0-2007 | Asia | Iran | C2 | 2007 | JN242275.1 |
| AS-IRA30-A0-2006 | Asia | Iran | A0 | 2006 | JN242274.1 |
| AS-IRA31-C0-2008 | Asia | Iran | C0 | 2008 | JN242273.1 |
| AS-IRA32-C0-2007 | Asia | Iran | C1 | 2007 | JN242272.1 |
| AS-IRA33-C0-2006 | Asia | Iran | C2 | 2006 | JN242271.1 |
| AS-IRA34-C0-2007 | Asia | Iran | C2 | 2007 | JN242270.1 |
| AS-IRA35-C0-2008 | Asia | Iran | C3 | 2008 | JN242269.1 |
| AS-IRA36-C0-2007 | Asia | Iran | C0 | 2007 | JN242268.1 |
| AS-IRA37-C0-2008 | Asia | Iran | C3 | 2008 | JN242267.1 |
| AS-IRA38-C0-2007 | Asia | Iran | C2 | 2007 | JN242266.1 |
| AS-IRA39-C0-2008 | Asia | Iran | C3 | 2008 | JN242265.1 |
| AS-IRA40-C0-2008 | Asia | Iran | C2 | 2008 | JN242264.1 |
| AS-IRA41-A0-2007 | Asia | Iran | A0 | 2007 | JN242263.1 |
| AS-IRA42-C0-2007 | Asia | Iran | C0 | 2007 | JN242262.1 |
| AS-IRA43-C0-2000 | Asia | Iran | C2 | 2000 | JN242261.1 |

---

---

|                  |        |                  |    |      |            |
|------------------|--------|------------------|----|------|------------|
| AS-IRA44-C0-2001 | Asia   | Iran             | C2 | 2001 | JN242260.1 |
| AS-IRA45-C0-2006 | Asia   | Iran             | C2 | 2006 | JN242259.1 |
| AS-IRA46-C0-2006 | Asia   | Iran             | C3 | 2006 | JN242258.1 |
| AS-IRA47-C0-2004 | Asia   | Iran             | C0 | 2004 | JN242257.1 |
| AS-IRA48-C0-2009 | Asia   | Iran             | C0 | 2009 | JN242256.1 |
| AS-IRA49-C0-2004 | Asia   | Iran             | C0 | 2004 | JN242255.1 |
| AS-IRA50-C0-2004 | Asia   | Iran             | C1 | 2004 | JN242254.1 |
| AS-IRA51-C0-2008 | Asia   | Iran             | C0 | 2008 | JN242253.1 |
| AS-IRA52-C0-2007 | Asia   | Iran             | C3 | 2007 | JN242252.1 |
| AS-IRA52-C0-2009 | Asia   | Iran             | C0 | 2009 | JN242292.1 |
| AS-IRA53-C0-2009 | Asia   | Iran             | C0 | 2009 | JN242291.1 |
| AS-IRA54-C0-2008 | Asia   | Iran             | C2 | 2008 | JN242290.1 |
| AS-IRA55-C0-2008 | Asia   | Iran             | C0 | 2008 | JN242289.1 |
| AS-IRA56-C0-2002 | Asia   | Iran             | C2 | 2002 | JN242288.1 |
| AS-IRA57-C0-2008 | Asia   | Iran             | C3 | 2008 | JN242287.1 |
| AS-IRA58-C0-2009 | Asia   | Iran             | C0 | 2009 | JN242286.1 |
| AS-IRA59-C0-2008 | Asia   | Iran             | C0 | 2008 | JN242285.1 |
| EU-SSI01-N0-1995 | Europe | Southern Siberia | A3 | 1995 | GQ861492.1 |
| EU-SSI02-N0-1995 | Europe | Southern Siberia | A3 | 1995 | GQ861491.1 |
| EU-SSI03-N0-1995 | Europe | Southern Siberia | A3 | 1995 | GQ861490.1 |
| EU-SSI04-N0-1995 | Europe | Southern Siberia | A3 | 1995 | GQ861489.1 |
| EU-SSI05-N0-1995 | Europe | Southern Siberia | A3 | 1995 | GQ861488.1 |
| EU-SSI06-N0-1995 | Europe | Southern Siberia | A3 | 1995 | GQ861487.1 |
| EU-SSI07-N0-1995 | Europe | Southern Siberia | C2 | 1995 | GQ861486.1 |
| EU-SSI08-N0-1995 | Europe | Southern Siberia | A3 | 1995 | GQ861485.1 |
| EU-SSI09-N0-1995 | Europe | Southern Siberia | A3 | 1995 | GQ861484.1 |
| EU-SSI10-N0-1995 | Europe | Southern Siberia | A3 | 1995 | GQ861483.1 |
| EU-SSI11-N0-1995 | Europe | Southern Siberia | A2 | 1995 | GQ861482.1 |
| EU-SSI12-N0-1995 | Europe | Southern Siberia | C2 | 1995 | GQ861481.1 |
| EU-SSI13-N0-1995 | Europe | Southern Siberia | A3 | 1995 | GQ861480.1 |
| EU-SSI14-N0-1995 | Europe | Southern Siberia | A3 | 1995 | GQ861479.1 |
| EU-SSI15-N0-1995 | Europe | Southern Siberia | A3 | 1995 | GQ861478.1 |

---

|                  |        |                  |    |      |            |
|------------------|--------|------------------|----|------|------------|
| EU-SSII6-N0-1995 | Europe | Southern Siberia | A3 | 1995 | GQ861477.1 |
| EU-SSII7-N0-1995 | Europe | Southern Siberia | A3 | 1995 | GQ861476.1 |
| EU-SSII8-N0-1995 | Europe | Southern Siberia | A3 | 1995 | GQ861475.1 |

ζ: Sequence subtype was not explicitly determined via phylogenetic analysis.

**Appendix Table2: Genetic distance between groups and within groups**

|                             | <b>China</b> | <b>Iran</b> | <b>Italy-Greece</b> | <b>Southern<br/>Siberia</b> |
|-----------------------------|--------------|-------------|---------------------|-----------------------------|
| <b>China</b>                | 0.094        | 0.101       | 0.097               | 0.094                       |
| <b>Iran</b>                 | -            | 0.074       | 0.102               | 0.125                       |
| <b>Italy-Greece</b>         | -            | -           | 0.097               | 0.095                       |
| <b>Southern<br/>Siberia</b> | -            | -           | -                   | 0.036                       |

**Appendix Table3: Sites found to be under positive selection pressure via three approaches within Chinese sequences.**

| <b>Codon</b> | <b>SLAC</b>  |                | <b>FEL</b>   |                | <b>REL</b>   |                     |
|--------------|--------------|----------------|--------------|----------------|--------------|---------------------|
|              | <b>dN-dS</b> | <b>p value</b> | <b>dN-dS</b> | <b>p value</b> | <b>dN-dS</b> | <b>Bayes Factor</b> |
| 31           | 3.907        | 0.066          | 42.514       | 0.022          | 13.172       | >10000              |
| 33           | 3.224        | 0.022          | 32.170       | 0.005          | 13.047       | >10000              |
| 35           | 2.738        | 0.252          | 28.223       | 0.089          | 13.009       | >10000              |
| 36           | 3.914        | 0.120          | 55.246       | 0.013          | 13.164       | >10000              |
| 39           | 1.645        | 0.229          | 18.231       | 0.092          | 9.452        | 4702.75             |
| 40           | 2.954        | 0.063          | 30.498       | 0.026          | 13.073       | >10000              |
| 42           | 2.769        | 0.099          | 32.330       | 0.013          | 13.111       | >10000              |
| 44           | 2.004        | 0.181          | 23.283       | 0.036          | 12.100       | >10000              |
| 74           | 3.690        | 0.032          | 37.842       | 0.008          | 13.176       | >10000              |



<sup>[1]</sup><sub>SEP</sub>SLAC P value < 0.5; <sup>[1]</sup><sub>SEP</sub>FEL P value < 0.25; REL Bayes factor > 50<sup>[1]</sup><sub>SEP</sub>.

**Appendix Table4: Sites found to be under positive selection pressure via three approaches within all sequences.**

| Codon | SLAC  |         | FEL    |         | REL    |              |
|-------|-------|---------|--------|---------|--------|--------------|
|       | dN-dS | p value | dN-dS  | p value | dN-dS  | Bayes Factor |
| 20    | 3.589 | 0.002   | 10.562 | 0.000   | 3.657  | 360.439      |
| 22    | 2.486 | 0.001   | 7.776  | 0.000   | 12.221 | 2154.34      |
| 24    | 3.084 | 0.019   | 9.892  | 0.005   | 16.327 | 475.574      |
| 25    | 4.336 | 0.000   | 13.680 | 0.000   | 21.175 | >10000       |
| 26    | 0.995 | 0.091   | 3.096  | 0.023   | 5.047  | >10000       |
| 28    | 1.443 | 0.036   | 4.568  | 0.012   | 6.449  | >10000       |
| 29    | 2.135 | 0.015   | 6.026  | 0.022   | 13.432 | >10000       |
| 30    | 2.842 | 0.004   | 9.568  | 0.000   | 12.438 | >10000       |
| 31    | 3.100 | 0.007   | 11.823 | 0.000   | 5.887  | 2702.75      |
| 54    | 2.640 | 0.002   | 7.807  | 0.000   | 12.988 | >10000       |
| 63    | 2.162 | 0.014   | 6.263  | 0.009   | 12.133 | 112.556      |

<sup>[1]</sup><sub>SEP</sub>SLAC P value < 0.5; <sup>[1]</sup><sub>SEP</sub>FEL P value < 0.25; REL Bayes factor > 50<sup>[1]</sup><sub>SEP</sub>.

**Appendix Figure1:** The Maximum Likelihood tree of KSHV sequences with following parameters: 1,000 bootstrap replicates, randomly broken site, and general time-reversible distance measure with a gamma distribution shape parameter of 0.5.

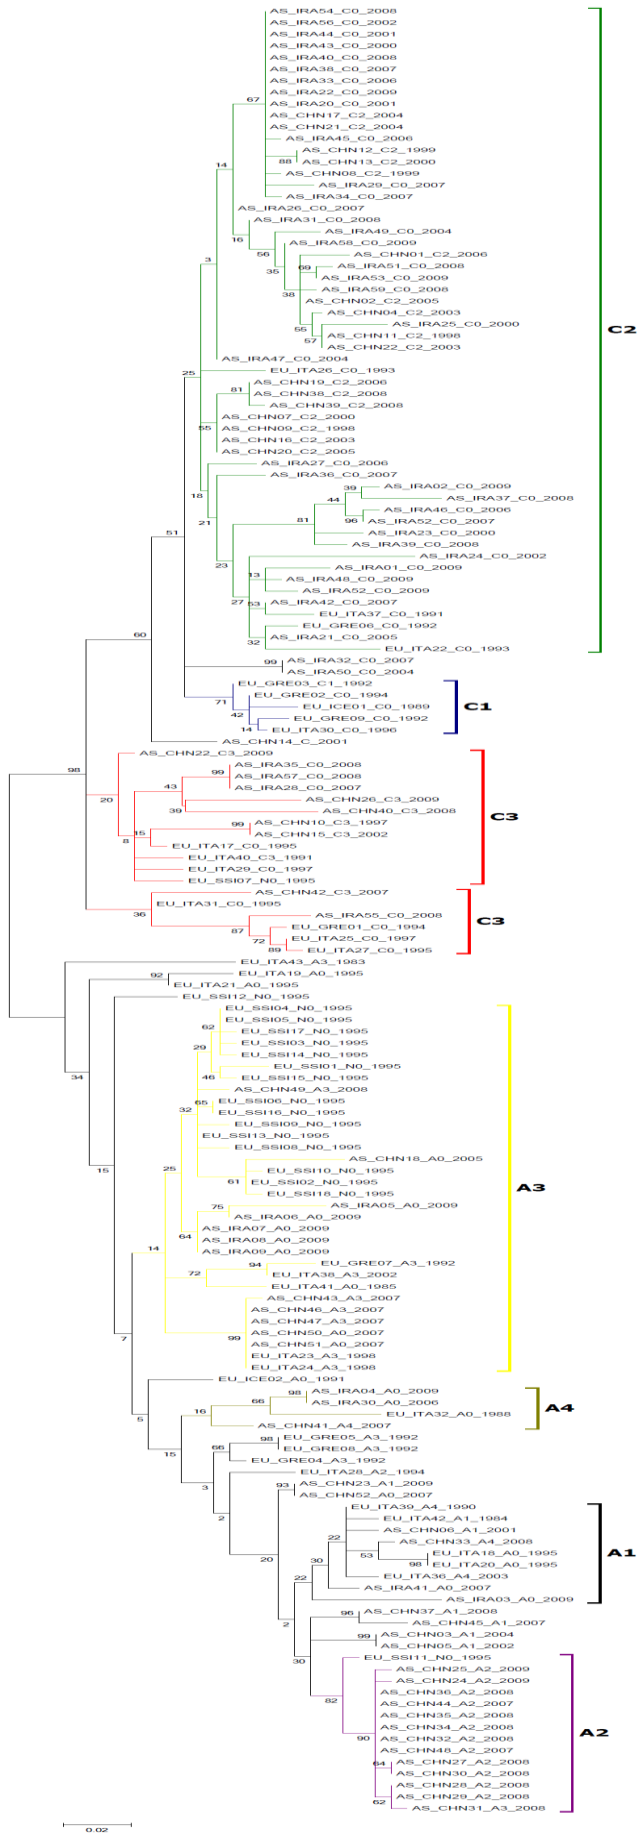

**Appendix Figure2:** The Maximum Parsimony tree of KSHV sequences with following parameters: 1,000 bootstrap replicates, randomly broken site, and general time-reversible distance measure with a gamma distribution shape parameter of 0.5.

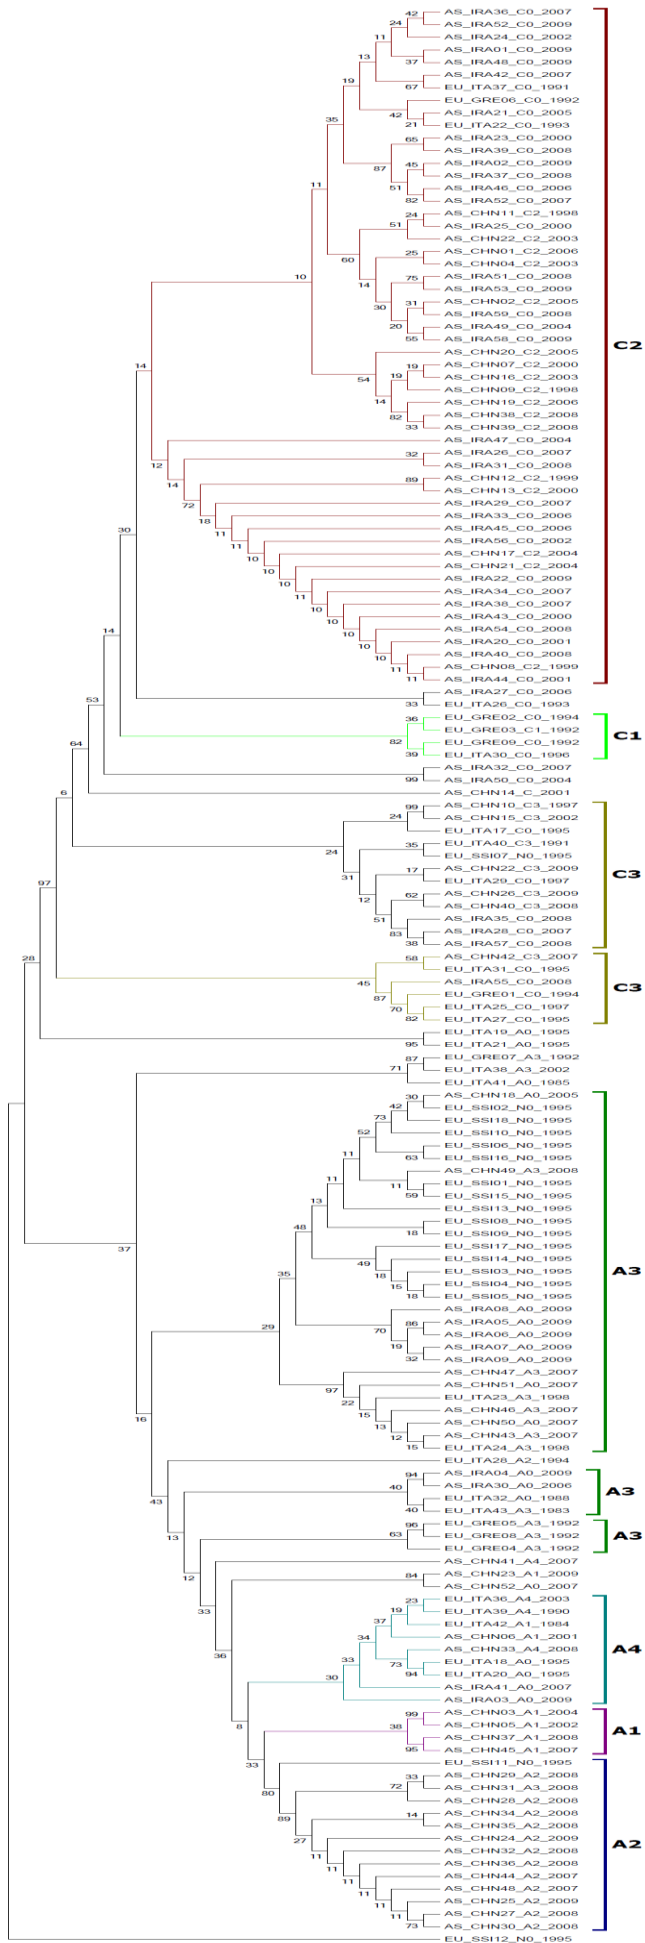

**Appendix Figure3: The MCC tree of KSHV sequences from Xinjiang, China.**

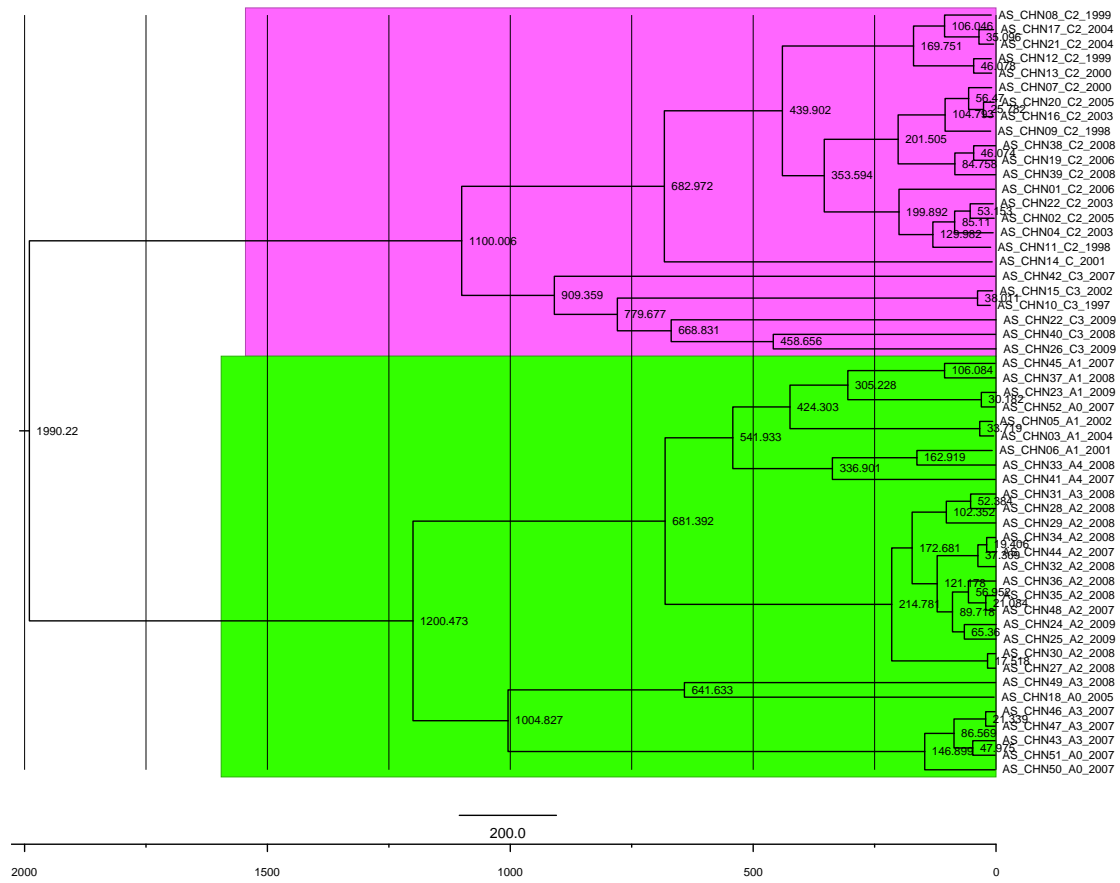

**Appendix Figure4: The MCC tree of KSHV sequences from Iran.**

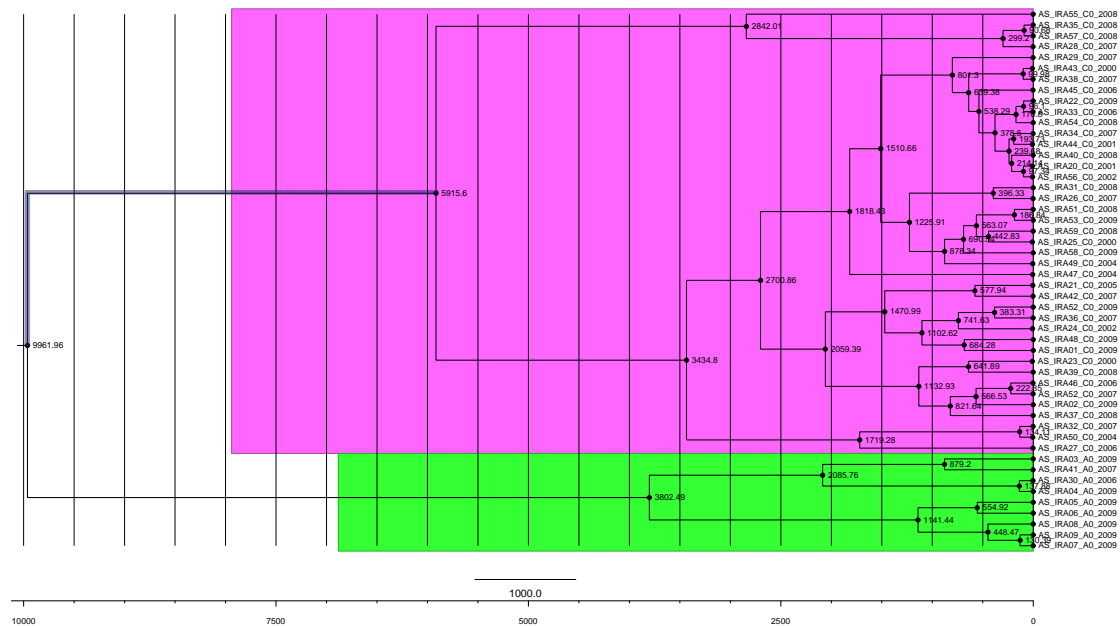

**Appendix Figure5: The MCC tree of KSHV sequences from Italy & Greece.**

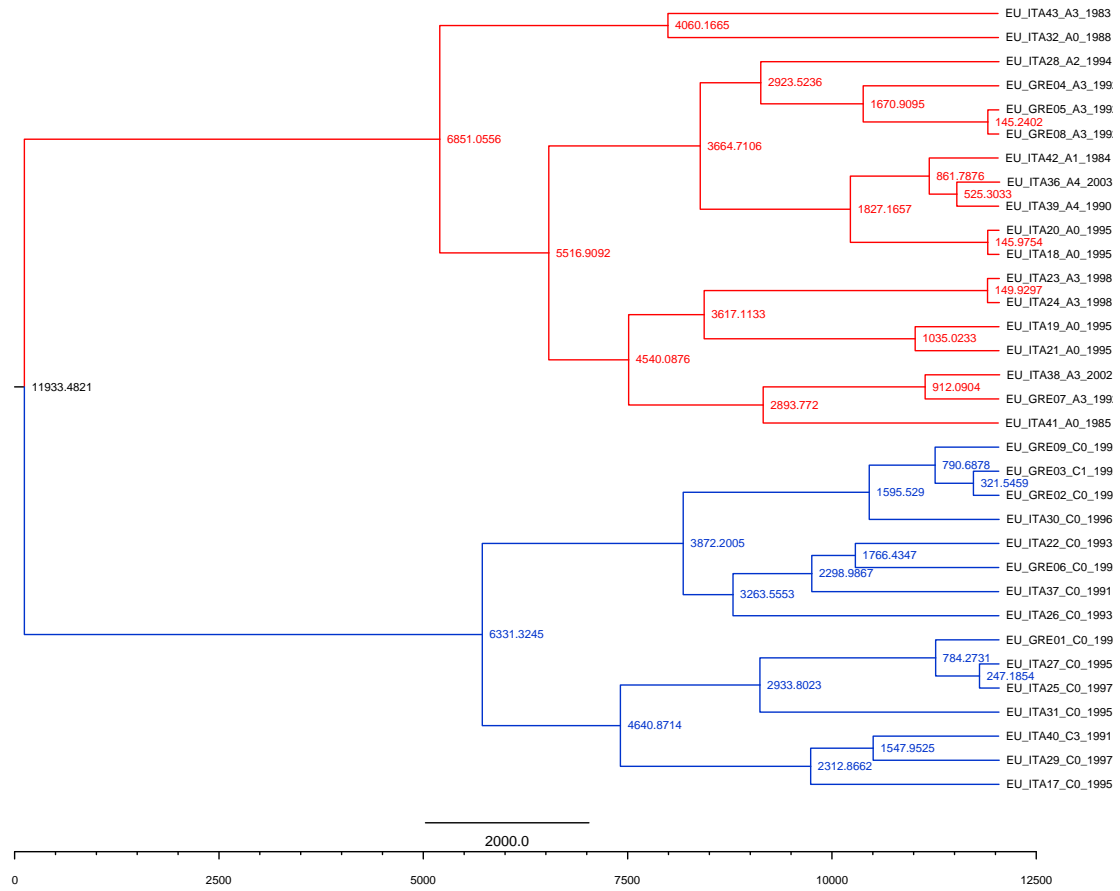

**Appendix Figure6: The MCC tree of KSHV sequences from Southern Siberia.**

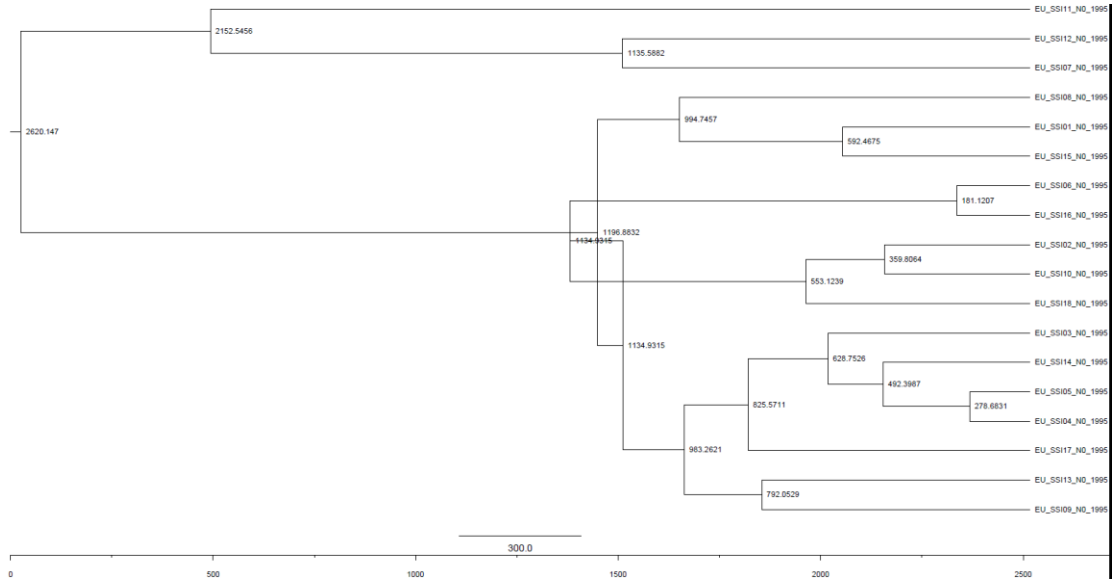

**Appendix Figure7: The Bayesian skyline plot of KSHV sequences from China.**

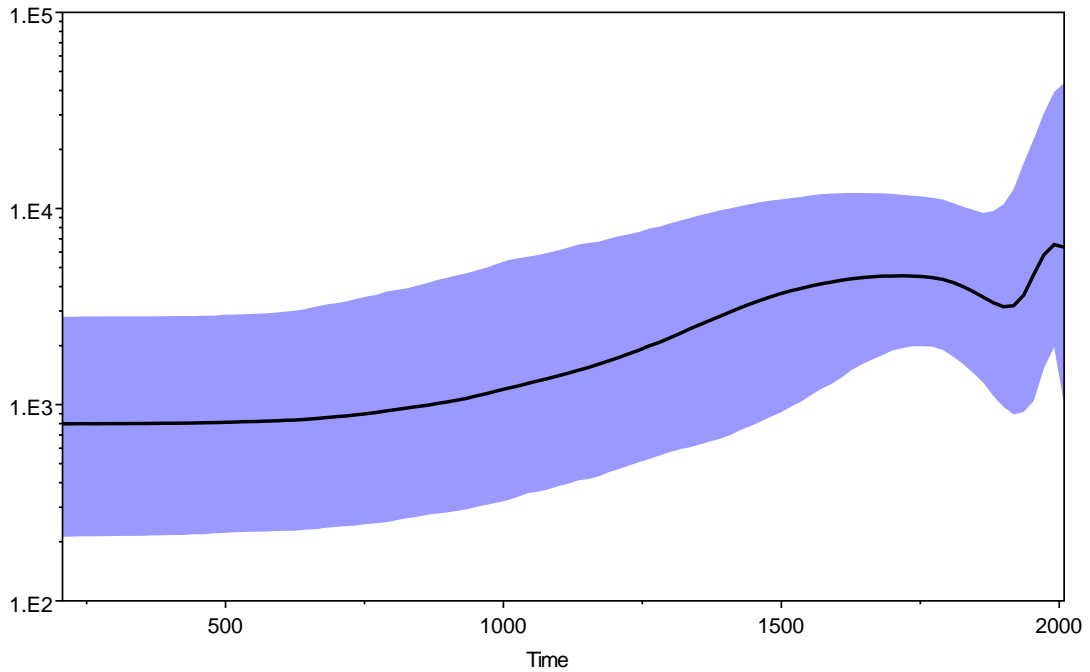

**Appendix Figure8: The Bayesian skyline plot of KSHV sequences from Iran, Italy & Greece.**



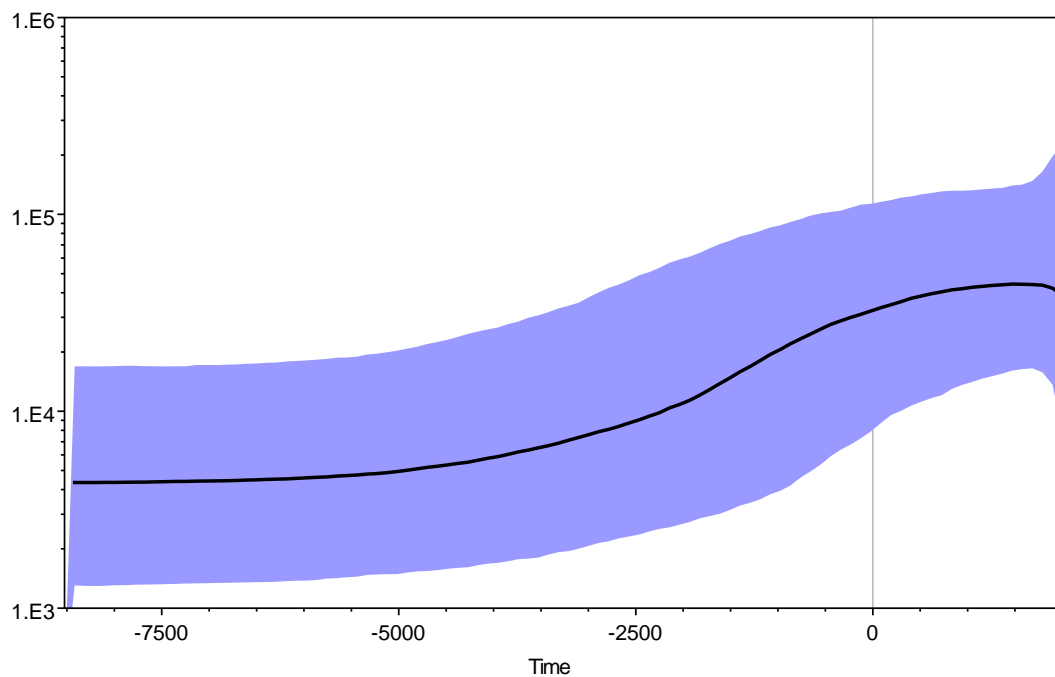

**Appendix Figure9: The Bayesian skyline plot of KSHV sequences from Southern Siberia.**

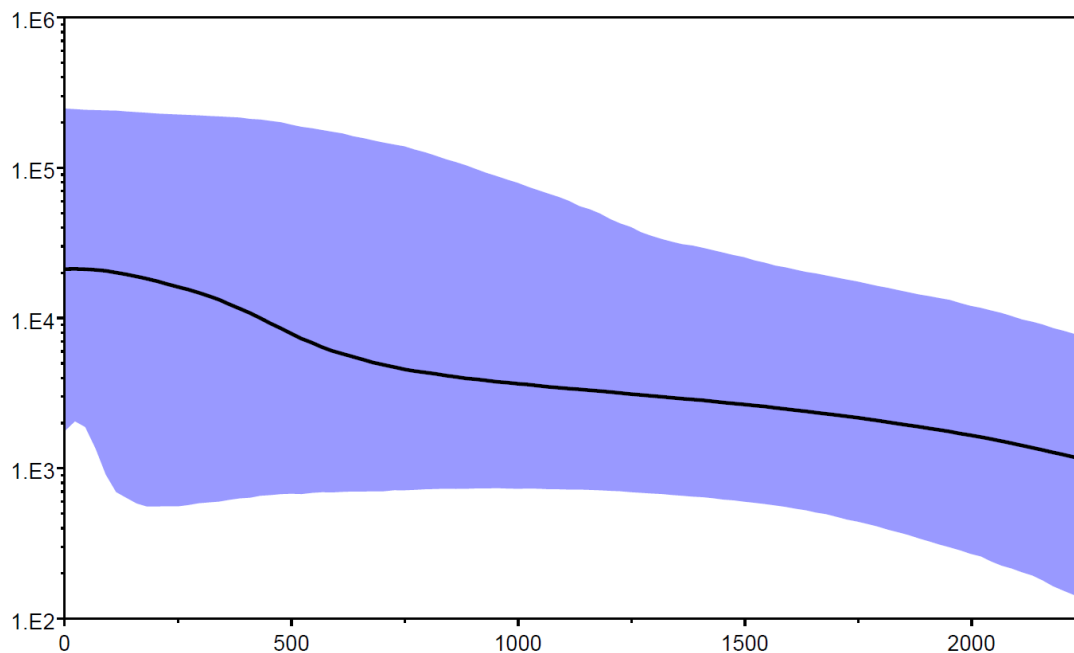

**Appendix Figure10: The substitution rate of KSHV ORFK1 obtained from Bayesian evolutionary analysis.**

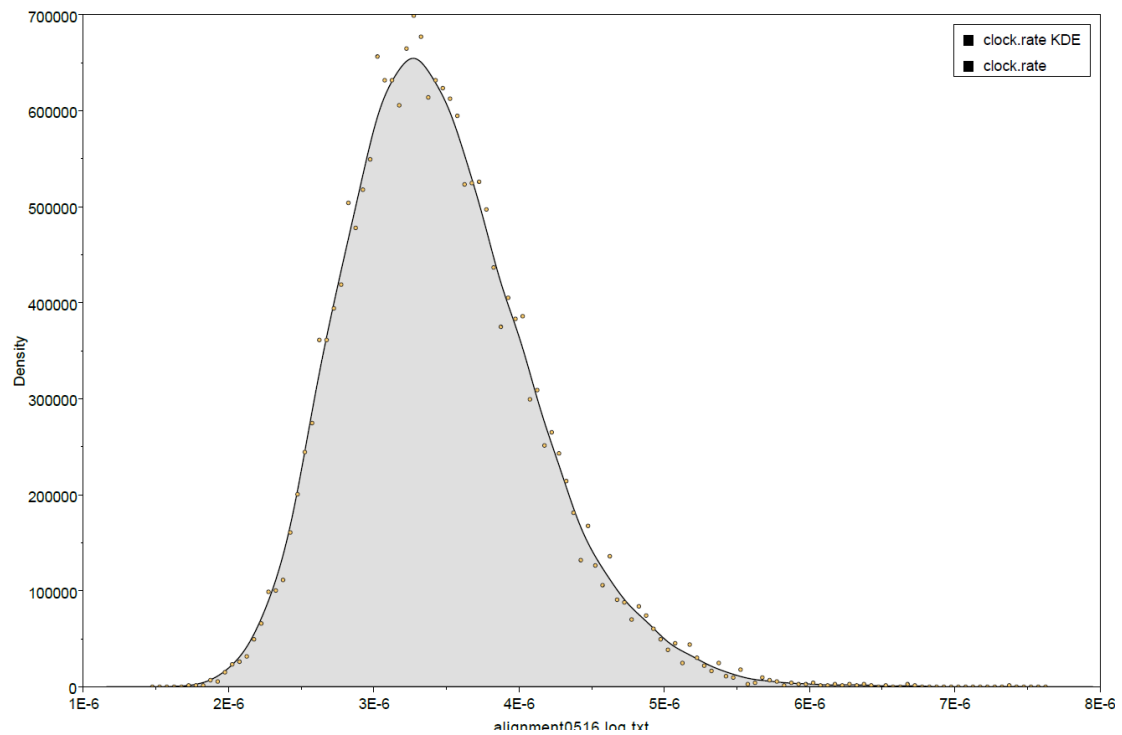

**Appendix Figure11: The tree height of KSHV ORFK1 obtained from Bayesian evolutionary analysis.**

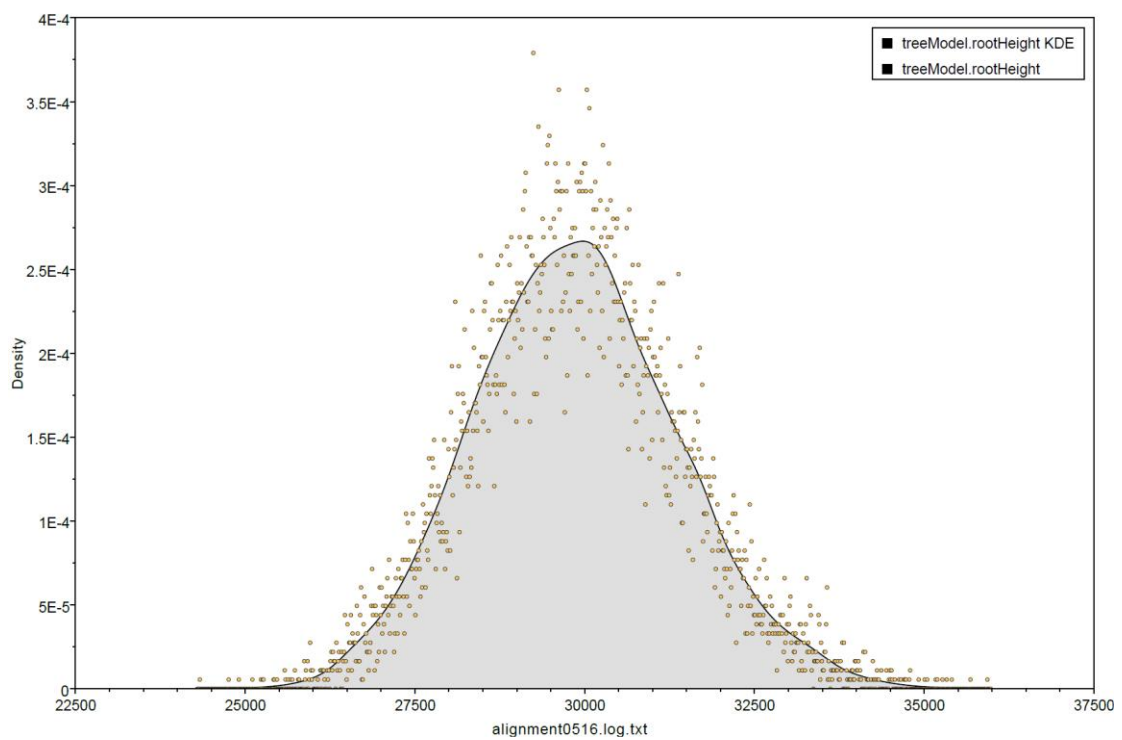

Supplement: NIHMS1864610-supplement-Supplementary_figs.pdf [file NIHMS1864610-supplement-Supplementary_figs.pdf]
